# Supplementary material for: The hTERT-p50 homodimer inhibits PLEKHA7 expression to promote gastric cancer invasion and metastasis
Source: PubMed Central journal article supplement (PMC10063444; doi:10.1038/s41388-023-02630-9), 2023-02-23

A

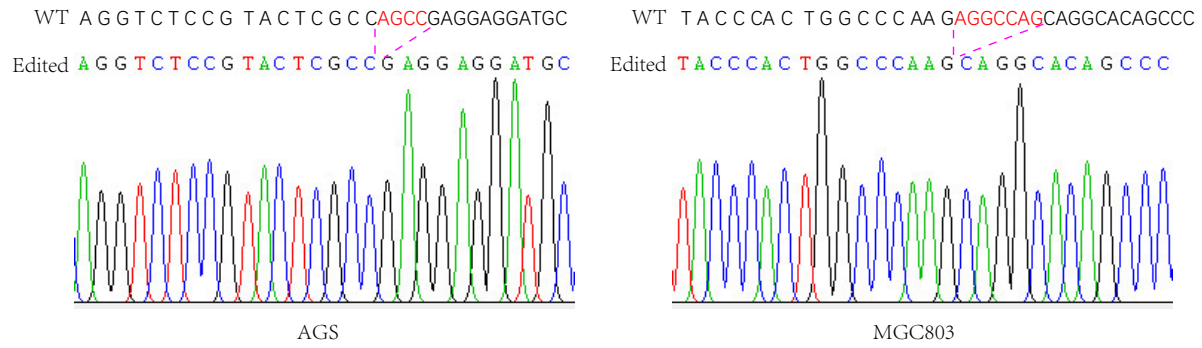

B

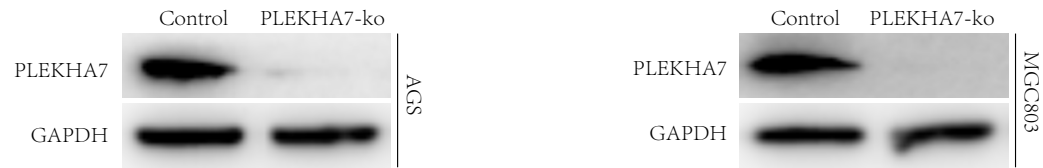

C

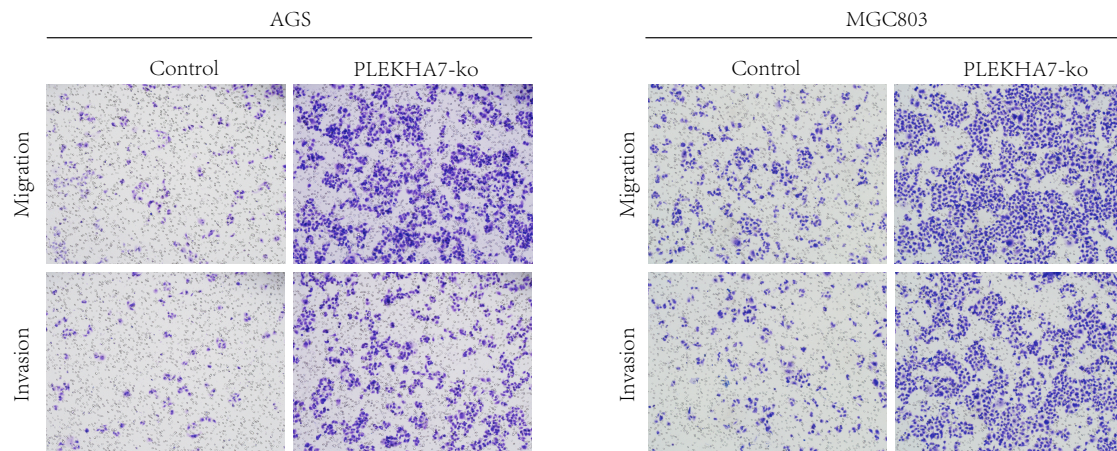

Supplement: 41388_2023_2630_MOESM3_ESM.pdf [file 41388_2023_2630_MOESM3_ESM.pdf]
