# Supplementary material for: The hTERT-p50 homodimer inhibits PLEKHA7 expression to promote gastric cancer invasion and metastasis
Source: PubMed Central journal article supplement (PMC10063444; doi:10.1038/s41388-023-02630-9), 2023-02-23

A

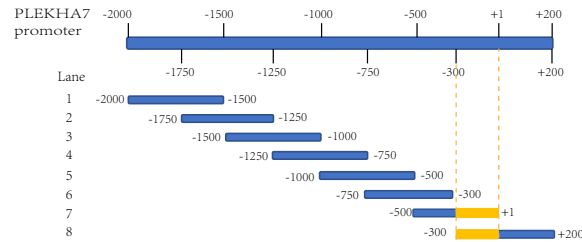

B

PLEKHA7 promoter reporter (-2000 to TSS)

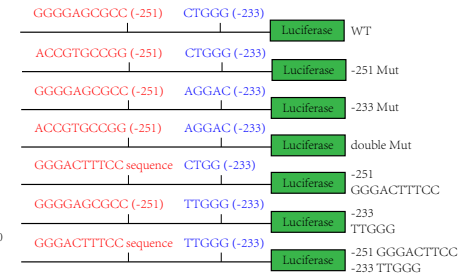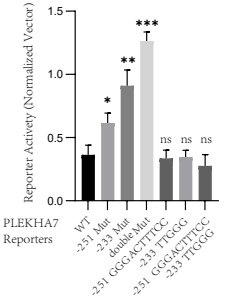

C

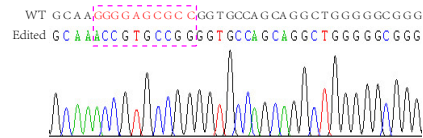

D

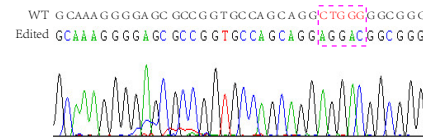

E

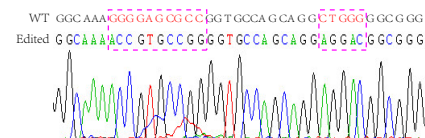

F

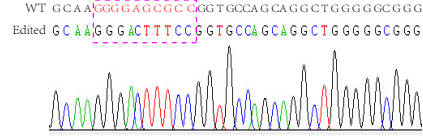

G

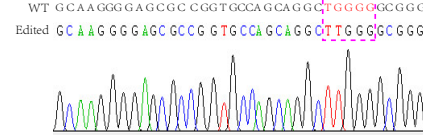

H

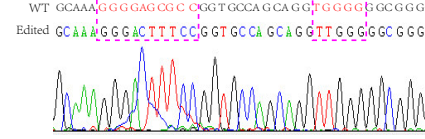

I

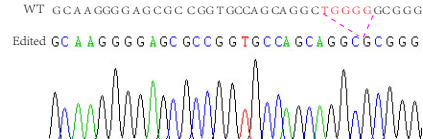

J

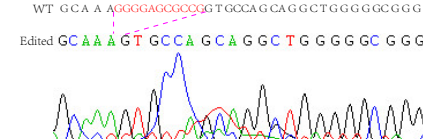

K

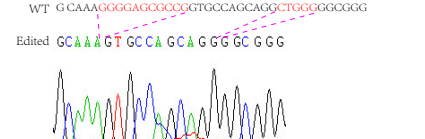

Supplement: 41388_2023_2630_MOESM8_ESM.pdf [file 41388_2023_2630_MOESM8_ESM.pdf]
